# Supplementary material
Source: PubMed Central journal article supplement (PMC5916473)
Supplement: str-49-1248-s003.pdf [file str-49-1248-s003.pdf]

## Change of Authorship Form

(Must be completed and signed by ALL authors)

Please check all that apply

New author(s) have been added (in addition to this form, all new authors must complete the copyright transfer agreement and conflict of interest disclosure.

Change in order of authorship.

An author wishes to remove his/her name. An author's name may only be removed his/her own request and a letter signed by the author should accompany this form

Manuscript Number STROKE/2017/020353R1

Manuscript Title Human neural stem cell extracellular vesicles improve recovery in a porcine model of ischemic stroke

### Former Authorship

Please list ALL AUTHORS in the same order as the original submission. For more than 12, use an extra sheet.

#### Print Name

Name (1) Robin L. Webb  
 Name (2) Erin E. Kaiser  
 Name (3) Brian J. Jurgielewicz  
 Name (4) Samantha Spellicy  
 Name (5) Shelley L. Scoville  
 Name (6) Tyler A. Thompson

#### Print Name

Name (7) David C. Hess  
 Name (8) Franklin D. West  
 Name (9) Steven L. Stice  
 Name (10) \_\_\_\_\_  
 Name (11) \_\_\_\_\_  
 Name (12) \_\_\_\_\_

### New Authorship

All authors must sign below agreeing to the changes in authorship. The authorship order must reflect the authorship order of the manuscript.

|                                       |                                                                                                       |                        |
|---------------------------------------|-------------------------------------------------------------------------------------------------------|------------------------|
| Name (1) <u>Robin L. Webb</u>         | Signature <u>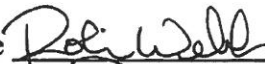</u> | Date <u>02/12/2018</u> |
| Name (2) <u>Erin E. Kaiser</u>        | Signature <u></u> | Date <u>02/12/2018</u> |
| Name (3) <u>Brian J. Jurgielewicz</u> | Signature <u></u>  | Date <u>02/12/2018</u> |
| Name (4) <u>Samantha Spellicy</u>     | Signature <u></u> | Date <u>02/12/2018</u> |
| Name (5) <u>Shelley L. Scoville</u>   | Signature <u></u> | Date <u>02/12/2018</u> |
| Name (6) <u>Tyler A. Thompson</u>     | Signature <u></u> | Date <u>02/12/2018</u> |
| Name (7) <u>Raymond L. Swetenburg</u> | Signature <u></u>  | Date <u>02/12/2018</u> |
| Name (8) <u>David C. Hess</u>         | Signature <u></u> | Date <u>02/12/2018</u> |
| Name (9) <u>Franklin D. West</u>      | Signature <u></u> | Date <u>02/12/2018</u> |
| Name (10) <u>Steven L. Stice</u>      | Signature <u></u>  | Date <u>2/12/2018</u>  |
| Name (11) _____                       | Signature _____                                                                                       | Date _____             |
| Name (12) _____                       | Signature _____                                                                                       | Date _____             |

Please scan and email to [stroke@strokeahajournal.org](mailto:stroke@strokeahajournal.org).
