# Supplementary material
Source: PubMed Central journal article supplement (PMC5916473)
Supplement: str-49-1248-s004.pdf [file str-49-1248-s004.pdf]

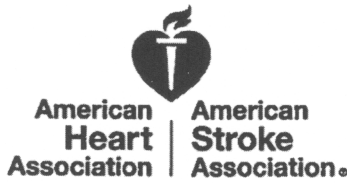

**Acknowledgment Permission Form**

**Journal** Stroke

**Manuscript Number** STROKE/2017/020353R2

**First Author** Robin Webb, Erin Kaiser

**Title of Work** Human neural stem cell extracellular vesicles improve recovery in a porcine model of ischemic stroke

Authors must provide written permission/approval from all individuals mentioned by name in the Acknowledgments section of a submitted manuscript. By signing this form, any and all acknowledged persons therefore state that they have read and approved the mention of their names in the Acknowledgment section of the aforementioned paper.

| Name                                         | Signature          | Date               |
|----------------------------------------------|--------------------|--------------------|
| Name (1) <u>Simon R. Platt, DVM</u>          | <u>[Signature]</u> | <u>13 MAR 2018</u> |
| Name (2) <u>Caroline Jackson</u>             | <u>[Signature]</u> | <u>12 MAR 2018</u> |
| Name (3) <u>Justin Sharma</u>                | <u>[Signature]</u> | <u>13 MAR 2018</u> |
| Name (4) <u>Austin Passaro</u>               | <u>[Signature]</u> | <u>12 MAR 2018</u> |
| Name (5) <u>Viviana Martinez</u>             | <u>[Signature]</u> | <u>12 MAR 2018</u> |
| Name (6) <u>Tracey Stice</u>                 | <u>[Signature]</u> | <u>12 MAR 2018</u> |
| Name (7) <u>Julie Nelson</u>                 | <u>[Signature]</u> | <u>14 MAR 2018</u> |
| Name (8) <u>Gabriel Popescu (Phi Optics)</u> | <u>[Signature]</u> | <u>3/15/2018</u>   |
| Name (9) _____                               | Signature _____    | Date _____         |
| Name (10) _____                              | Signature _____    | Date _____         |
| Name (11) _____                              | Signature _____    | Date _____         |
| Name (12) _____                              | Signature _____    | Date _____         |
| Name (13) _____                              | Signature _____    | Date _____         |
| Name (14) _____                              | Signature _____    | Date _____         |
| Name (15) _____                              | Signature _____    | Date _____         |
| Name (16) _____                              | Signature _____    | Date _____         |
| Name (17) _____                              | Signature _____    | Date _____         |
| Name (18) _____                              | Signature _____    | Date _____         |
| Name (19) _____                              | Signature _____    | Date _____         |
| Name (20) _____                              | Signature _____    | Date _____         |
